# Supplementary material
Source: PubMed Central journal article supplement (PMC4854693)
Supplement: supp_pp.15.01919_PP2015-01919R1_Supplemental_Figures.pdf [file supp_pp.15.01919_PP2015-01919R1_Supplemental_Figures.pdf]

```

SmIRX9L      TILEGVPVDGH-----KVTGWHTNEKSKR-----LRRFHVDM
PpIRX9       VVFEQPVCEGE-----KVIGWHTSDRSKR-----LRRFHVDM
OsIRX9       VMVQGPLCINTSSSSVITRGWFDMDMDMAAGG-----ERRAAADRPPPETLMEV
LmIRX9       VLVQGPACASAS-----KVIGWFSRDLSSTTVSTGQATPTGGTPAGAGAARPPSSAPEIDV
PtIRX9       VTIEGVPDSS-----QVIGWHLKKNMNET-----DKRPP IHI
AtIRX9       VVVEGVPCESS-----QVLGWHLRKINNET-----ETKPP IHI
AoIRX9       VVVEGPMCRSS-----KVVGWQLKDLNHTSDTSN---PIPSPDANNGGIAERKHARINI
. . : * * * . . * * . . : .

OsIRX9L      SGFAFNSTILWDPQRWNS-PTLESIIVHSGGRGGLQESRFIEK-LVEDES--QMEGLG-D
AtIRX9L      SGFAFNSTILWDPKRWR- PFSHPTRQLDVTKEGFQETSFIEQ-VVADES--EMEGVP-P
AoIRX9L      SGFAFNSTVLWDIKRWHR-PTLEPIRQRHSSSEGFQATTFIEQ-LVEDES--QMEGLL-S
SmIRX9L      SGFGFNSTILWDPRRWKR-PTTQPVRQLDVTKEGFQETTFIEQ-LVEDEN--QMEGLP-S
PpIRX9       SGFAFNSTMLWDPRRWKR-PTLEPIRQLDSIKESSQQT SFIEQ-LVPDES--YMEGRP-P
OsIRX9       GGFAFSSWMLWDPHRWDRFPLSDPDASQESVK-----FVQRVAVEEYNQSTTRGMPDS
LmIRX9       HGFANSSVLWDPERWGRYPTSEPKSQDSIR-----FVQQVVTEDEYS--KVKGIP-S
PtIRX9       SSFGFNSSILWDPERWGR-PSSVQQT SQNSIK-----FVKQAALEDET--ELKGIPE
AtIRX9       SSFAFNSSILWDPERWGR-PSSVEGTSQDSIK-----YVKQVLEDDT--KLKGLPAQ
AoIRX9       SGFAFNSSILWDPERWGR-PSSVLDT SQDSIK-----FVQEVVLEDES--KLKAIP-S
. * . * . : * * * . * * . . : . . : . .

OsIRX9L      NCTRVVMWNFELEPPQ-VNYP IGWLLQRNLDAVVPIT-----
AtIRX9L      ACSSILNWHHLHDALD-VPYPQGWAIQKNLQALITMK-----
AoIRX9L      NCSKILVWHHLHLEAPE-LLNPEGWSIQKNLELVVPLT-----
SmIRX9L      GCSKIMVWHHLHLESQI-ASYP SNWKMDKFLEPVIHL-----
PpIRX9       GCLKIMVWHHLQLEAPKGFPPYPARWTLTTPLEANIPLRKANLVQL
OsIRX9       DCSQIMLWRIQTTL-----
LmIRX9       DCSEIMVWRVEAPSSSRQAPGN--NNRR-----
PtIRX9       DCSKIMLWRLNLPVSKSPSYHL--STTGSTDASRRKI-----
AtIRX9       DCSKIMLWRLKFPTRTRLST-----
AoIRX9       DCSKIMLWHLHIPRTL TASPSS--SQSKNRR-----
* . : : * . .

```

### Supplemental Figure 1: GT43 IRX9/9L protein sequence alignments from various plant species.

\*= amino acid residues conserved across all species, := highly conserved across most species, . = conserved across some species. Grey shading indicates conserved cysteine (C) residues potentially involved in disulphide bonding. Transmembrane helices (TMHs) predicted by ARAMEMNON with high confidence (>0.85) for Arabidopsis and rice sequences are marked with a box. The red D's indicate the aspartic acid residues targeted for site-directed mutagenesis. IRX9/9L sequences from moss (*Physcomitrella patens*, *Pp*; Genbank accession: XP\_001751575.1), spikemoss (*Selaginella moellendorffii*, *Sm*; Genbank accession: XP\_002963107.1), black cotton wood (*Populus trichocarpa*, *Pt*; Genbank accession: XP\_006381488.1), Arabidopsis (*Arabidopsis thaliana*, *At*; Genbank accessions: NP\_181246.1, NP\_973922.1), rice (*Oryza sativa*, *Os*; Genbank accessions: NP\_001060738.1, NP\_001043846.1), asparagus (*Asparagus officinalis*, *Ao*; Genbank accessions: NP\_181246.1, AJF38259.1) and ryegrass (*Lolium multiflorum*, *Lm*; DDBJ accession: LC127415).

SmIRX14 MKSGSAA--AGGVLHPVLRRLTNAASTPRKSSGSSS-----PE-----RGGGG  
PpIRX14 -----  
AoIRX14B -----MKLSLLPQTYFPRRTNSLPSAE-----TT  
OsIRX14 -----MMKSLLP-QSQLRRSAAAASAARSSGGGAGSGGADGAGSDGGA  
LmIRX14 -----MMKSLLP-QSQLRRSAAAASAARSSAGAVEG-----AAAASDG  
AoIRX14A MASSITLVASSTSRLPKSKTHLP-TPLPKPSLSLKPSPSLPP-----AL-TAAAAAV  
PtIRX14 MKL--SMLQQ-----SYMNRRSASFRGSSAPL-----DSSTD  
AtIRX14L MKL--SVFRL-----SYWNRGSSFRSSP-SL-----DPSFD  
AtIRX14 MKL--SALHQ-----SYLNRRSNSFRSPT-SL-----DSSVD

SmIRX14 GVLLIGPGPLRLRCLHAVACIASLVLGFRFSRETLLVLLIDVGIKF--PYVEPGL-----  
PpIRX14 -----  
AoIRX14B SPKPSPASISYLLHFLCCLISLILGFRFSRMVFFLLFSSSTTIITVT-----  
OsIRX14 GGRAPATSTFWLLHALCCLVSLFLGFRFSRLLFFLLFSTTALYSSTS--SSSSAVLRA  
LmIRX14 AAKPSSSSTFWLLHALCCLISLFLGFRFSRLLFFLLFSTALYASNTNPNPSSSAVLRA  
AoIRX14A AADKSPSSLFWLALHSLCCLASLALGFRFSRLLFFLLFSTNPNPNPDQNHVAA----PV  
PtIRX14 NTKSPAAIFWLLHGFCCCLISLVLGFRFSRLVFFLLFSTSTTTT--LYIATPL----PH  
AtIRX14L GK--SPSSVFWFVIHGLCCLISLILGFRFSRLVFFLLFSTSVTN---LYTTPFL----FA  
AtIRX14 GSGKSLIAVFWLILHCLCCLISLVLGFRFSRLVFFLLFSTSTN---LYSLPFR----PD

SmIRX14 -GVRD-----GV-----QDGGRLPEVRTKSGRVHVGRHEIL  
PpIRX14 -----SSQVYVGRHPIL  
AoIRX14B -----TTTTTLTQTLTLPLL-----PSPHNKTQSGVAVGRHGIL  
OsIRX14 TTTTTTTTTTTTTTTNTFTLSFQANPNPPSNLSNHTALDAAGAAGHTQSHVVVGRHGIR  
LmIRX14 ITTTTTTTTTTTTTTTNTFTLSFNPNSTPPPTTNNHTPTL----EDATQSHVVVGRHGIR  
AoIRX14A LP-SRTL-----TLNLPQKLAPNLTAASRVVGRHGIL  
PtIRX14 LT-KTN-----NN--INDL-----PLEIPVINKTLSSSRVVVGRHGI-  
AtIRX14L GN-GG-----VSQLLRL-----KPLETATNSTVKKNRSRVVGRHGIR  
AtIRX14 LP-VKHL---DVHTIGRTLDP-----GANGTTVVATATKSSRVVGRHGIR

\* \* \* \* \*

SmIRX14 IRPWPHPDSEIYRAHALLERVQVEQSS-LYGPKERKTVIAITPTFARTFQAIHLLGVMH  
PpIRX14 KRPPHPDPIEMAQAYNMLARVQLEQQR-LYGIENWKPIAITPTYFRFTFQSLHLSGLMH  
AoIRX14B IRPWPHPDQPMRAHRLIERVQKEQRTVYYGIKKPKPLIVITPTYVVRTFQAMYLTGLMH  
OsIRX14 IRPWPHPDPVEVMRAHRIMERVQEEQRR-WYGVKEPRHVLVVTPTYSRAFQALHLLTGLLH  
LmIRX14 IRPWPHPDPVEVMRAHRIMDRVQEEQRR-WYGVREPRHVLAVTPTYHRAFQALHLLTGLLH  
AoIRX14A IRPFPHPDPTETMKAHRIIMERVQEQRA-QYGVKNRPVVVITPTYVVRTFQTLHLLTGLMH  
PtIRX14 RRPWPHPNPSEVMKAHQIIEVTVQREQRT-QFGVKSPTRLIVVTPTYVVRTFQTLHLLTGLMH  
AtIRX14L IRPWPHPNPIEVLRAHQLLVRVQKEQKS-MYGVRSPTVIIVVTPTYVVRTFQALHLLTGLMH  
AtIRX14 IRPWPHPNPVEVMKAHQIIGRVQKEQKM-IFGMKSSKMVIAVVTPTYVVRTFQALHLLTGLMH  
\*:\*:\*:\* : :\*: : : \* \* \* : :\* . . : : : \* \* \* : \* \* \* : \* \* \* : \*

SmIRX14 TLRAAPGPVIWIVVEAGGRSNETASILASSRL-EFVHLGVKD--AMPVAWEQRRRMETRL  
PpIRX14 TLSLVRRPVTWIVIEASGISAETAELLRQVRVHKLVLHGASE--HLPRTLQDRILIEARL  
AoIRX14B SLMLVPFDFTWLVVEAGGVSNETASILDRSHL-NYVHVPPFDEGKMPMEWGERKMEARM  
OsIRX14 SLRNVPYPLTWIVVEAGGTTNATASLLARSGL-TIVHIPFPD--RMPHDWADRHAENRM  
LmIRX14 SLRNVPYPLTWLVVEAGGVTNATAELLARSGL-TVVHVPPFD--RMPLDWERHATENRM  
AoIRX14A TLMLVPYDLTWIVVEAGGINSNETADLIERSKI-KTIHLGFER--GMPLKWDRHKMEALM  
PtIRX14 SLMLVPYDVLWIVVEAGGATNETASIIAKSSI-KTFHIGFTQ--KMPNSWEGRHKLETKM  
AtIRX14L SLMLVPYDLWIVVEAGGITNETASFIAKSGL-KTIHLGFDQ--KMPNTWEDRHKLETKM  
AtIRX14 SLMLVPYDLWIVVEAGGATNETGLIIAKSGL-RTIHVGIDQ--RMPNTWEDRSKLEVFM  
:\* . . \*:\*:\*:\* : \* . : : : \* : \* \* \* :

SmIRX14 RIEGLSHVREKLDGLILFADDSNVHSLQLFDEIQVKWIGALSVGLLETGSGATETASS  
PpIRX14 RTEGLRYVREQNLEGVIVFADESNVYSMQFFDEVQKVKWVGALPVGTLGYAGFEDPALL-  
AoIRX14B RLHALRVVREKKMDGIVVFA<sup>DD</sup>SNIHSTEMFDEIQVKKHIGAISVGFLTHSDI-----  
OsIRX14 RLHALRVVIREKMDGIVVFA<sup>DD</sup>SNVHSLLELFDEVQKQVWMAAVSVGILAHGTADQPRL-  
LmIRX14 RLHALRVVIREKMDGIVVFA<sup>DD</sup>SNVHSMELFDEAQKQVWMAAVSVGILAHGTAAEQPRL-  
AoIRX14A RIQALRVVREKLDGIVVFA<sup>DD</sup>SNMHSLLELFDEIQVKWIGALSVGILAHSGNSEPLVQN  
PtIRX14 RLRA-RVVREEMMDGIVVFA<sup>DD</sup>SNMHSMELFDEIQNVKWFAGVSVGILAHSGGGGESSA  
AtIRX14L RLHALRVVREKLDGIVVFA<sup>DD</sup>SNMHSMELFDEIQTVKWFAGVSVGILAHSGNADELSSI  
AtIRX14 RLQALRVVREKLDGIVVFA<sup>DD</sup>SNMHSMELFDEIQNVKWFAGVSVGILAHSGNAEEMVLS  
\* . . : : : \* \* \* : \* \* \* : \* \* \* : \* \* \* : \* \* \*

SmIRX14 MV-----AAASSAKPRLPVQGPACNETCHVVGWHVLRPSPVDGEDSSSSSFTDVAGGL  
PpIRX14 -----RDKVSRNTVLQVQGPCTDSENITGWRAFRLPLSLDDVLINE-----YRD--  
AoIRX14B -----EEENHSIPIQGPECTPSGKVFVGMQTLDPS-----  
OsIRX14 -----SEEDKQNMPLPVQGPACNSSGHLGWHTFNSLPFAGKTATV-----VGEAA  
LmIRX14 -----TEDDRKSMPLPVQGPACNASGQLAGWHTFNTLPFSGKTAAV-----VGEAA  
AoIRX14A EKK-----SEEDKENMPLPIQGPACNSSNQLVGHWHTFNSLPFMEIAT-----VGDVG  
PtIRX14 VAEK-----VKPNLSNPAMPVQGPACNASNKLVGWHTFNSLPYEGKSAVY-----IDDRA  
AtIRX14L LKNE-----QGNKEKPSMPIQGPSCNSSEKLVGWHIFNTQPYAKKTAVY-----IDDKA  
AtIRX14 MEKRKEMEKEEEEESSLPVQGPACNSTDQLIGWHIFNTLPYAGKSAVY-----IDDVA  
 : : \* \* \* : . . \* : :





```

AoIRX10      ESLYLKPGKELLNWTAGPVGDLKPW-----
PtIRX10      RSVYLRPSEKILNWTAGPVGDLKPW-----
              ::*  .:  ***:  **  .** *

```

**Supplemental Figure 3. GT47 IRX10 protein sequences alignment from various plant species.**

See supplemental Figure 1. legend for annotations. IRX10/10Lsequences from moss (*Physcomitrella patens*, *Pp*; Genbank accession: XP\_001753186.1), spikemoss (*Selaginella moellendorffii*, *Sm*; Genbank accession: XP\_002993593.1), black cotton wood (*Populus trichocarpa*, *Pt*; Genbank accession: XP\_002318180.1), Arabidopsis (*Arabidopsis thaliana*, *At*; Genbank accession: NP\_174064.1, NP\_568941.1), rice (*Oryza sativa*, *Os*; Genbank accession:Q8S1X7.1), asparagus (*Asparagus officinalis*, *Ao*; Genbank accession: AJF38260.1) and ryegrass (*Lolium multiflorum*, *Lm*; Genbank accession: LC127416)

## AoIRX9

1 GSIERSRKR IQLWKAAIH FSLCFVMGFF SGFAPTSTAS IFSGQANPYR  
51 STKNLGISAQ LAPQPLQNP ENNRSLMSSE VAENPANSSA THRSTADELS  
101 PRNLLIVITT SKPNDRFSGP FLRRLGNTLK LVSSPLLWII VEASNEASNN  
151 AELLRTTGIM YRHLYKENF TDAKAEADHQ RNVALNHIEY HRLNGIVHFA  
201 EVSNTYNLEF FDEIREIDTF GTWPMAMMSA NRRRVVVEGP MCRSSKVVGW  
251 QLKDLNHTS DTSNPISPD ANGGIAERK HARINISGFA FNSSILWDPE  
301 RWGRPSSVLD TSQDSIKFVQ EVVLEDESKL KAIPSDCSKI MLWHLHIPRT  
351 LTASPPSSQS KNRR

## AoIRX10

1 MRLGIWVFSI LLFSALIAEI EAQEIERRHR TERISGSAGD VLEDDPVGRL  
51 KVFVYELPSK YNKKILQKDQ RCLNHMFAAE IFMHRFLLSS PVRTLNPEEA  
101 DWFYTPVYTT CDLTPNGLPL PFKSPRMMS AIQLISSNWP YWNRTEGADH  
151 FFFVPHDFGA CFHYQEEKAI ERGILHLLSR ATLVQTFGQR NHVCLKDSGSI  
201 TIPPYAPPQK MQAHLIPDPT PRSIFVYFRG LFYDVGNDPE GGYARGARA  
251 SVWENFKDNP LFDISTEHPT TYYEDMQRAI FCLCPLGWAP WSPRLVEAVV  
301 FGCIPVIIAD DIVLPFADAI PWEDIGVFVA EKDVPNLDTI LTSISPDVIL  
351 RKQRLLANPS MKQAMLFPOP AQSGDAFHQV LNGLARKLPH DESLYLKPGE  
401 KLLNWTAGPV GDLKPW

## AoIRX14A

1 MASSITLVAS SSTSRLPSKK THLPTPLPKP SLSLPKPSPS LPPALTA  
51 AVAADKSPSS LFWLALHSLC CLASLALGFR FSRLLEFFLLE SNPSPNPND  
101 QNHVAAPVLP SRTLTLNLPQ KLAPNLTA SR VVVRHGILI RPFPHDPTE  
151 TMKAHRIMER VQQEQRAQYG VKNRPVVVI TPTYVRTFQT LHLTGLMHTL  
201 MLVPYDLTWI VVEAGGISNE TADLIERSKI KTIHLGFERG MPLKWDRHK  
251 MEALMRIQAL RVVKERKLDG IVVFADDSNM HSLELFDEIQ KVKWIGALSV  
301 GILAHSGNSE PLVQNEKKSE EDKENMPLPI QGPACNSSNQ LVGWHTFNSL  
351 PFMENIATTV GDVGTVLPTK IEWAGFVLNS KLWGEDEGK PEWVRDLDSV  
401 GLNGEEIESP LALLKEASGV EPLGSCGKKV MLWWLRVEAR ADSKFPPGWI  
451 INPPLDITVP AKRTPWPDAP PQLPSEKLPI DQDPAEKHPS KSGRSRSHS  
501 SRSKRKHEQR AGNAQITGAT P

**Supplemental Figure 4: Proteomic analysis of proteins co-immunoprecipitated with the AoIRX9 antibody from solubilised microsomal membranes (MMs) of *N. benthamiana* leaves co-expressing AoIRX9, AoIRX10 and AoIRX14A.** The underlined regions are the peptide antigens targeted to generate antibodies. The red regions are the tryptic peptides detected via proteomic analysis.

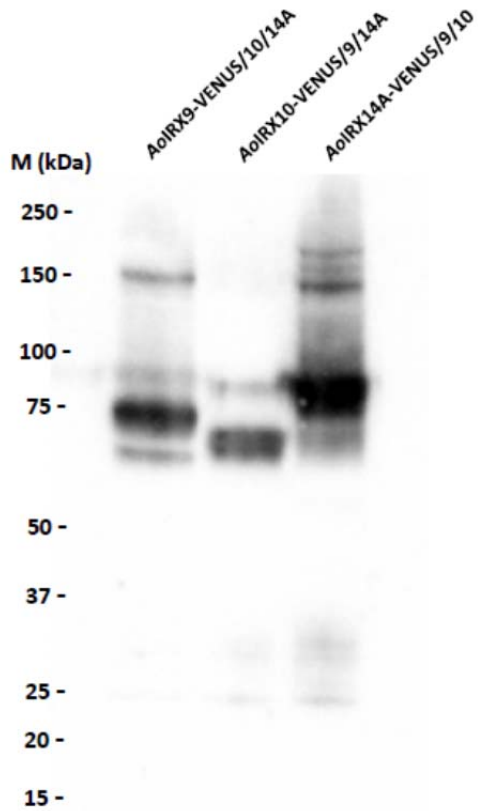

**Supplemental Figure 5: Western blot of *N. benthamiana* MMs expressing either *Asparagus* IRX9, IRX10 or IRX14A proteins conjugated with VENUS.** MMs extracted from *N. benthamiana* leaves co-expressing *Asparagus* IRX9, IRX10 and IRX14A. *AoIRX9*, *AoIRX10* and *AoIRX14A*, respectively, were fused at the COOH-terminus with VENUS. MMs were separated on an SDS-PAGE gel and a GFP antibody used as probe to demonstrate the relative expression level of the three tagged proteins. The bands ~75 kDa in size demonstrate the *asparagus* IRX proteins are conjugated with VENUS and do not undergo substantial cleavage.



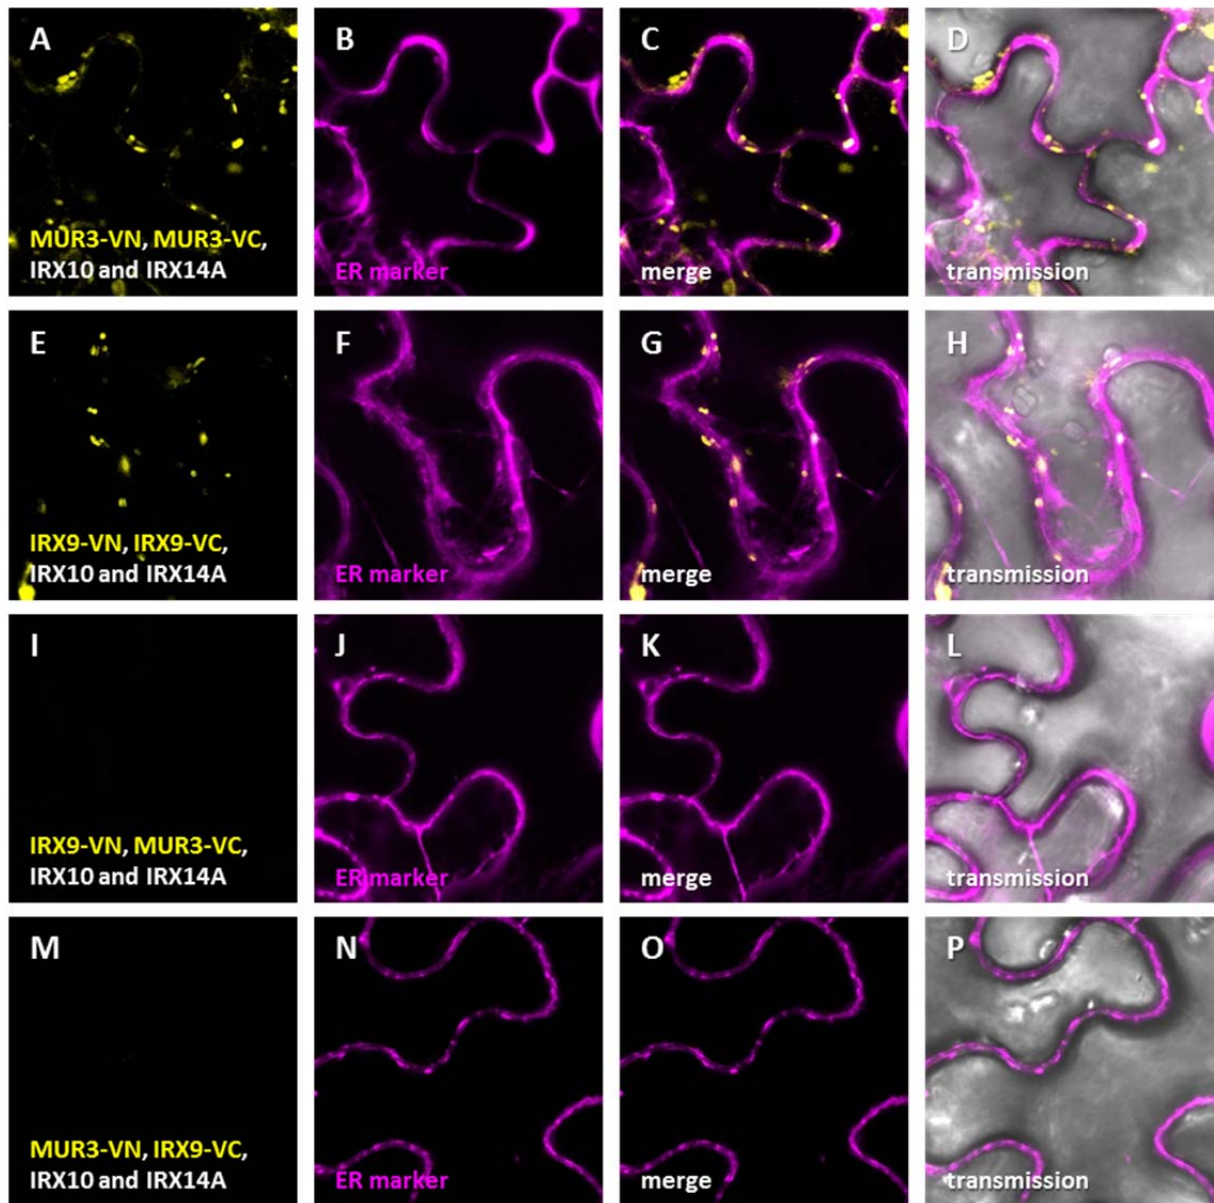

**Supplemental Figure 6: MUR3 positive control and expanded images from Figures 9A-C.**

MUR3 is known to form homo-dimers *in planta* (Søgaard *et al.*, 2012) and so it was used as a positive control for BiFC experiments. Strong fluorescent signal indicates this system is working (A-D). E-H shows the expanded figures from Figure 9A-C where the IRX9 homo-dimerisation is independent of the ER marker (MANI(49)-RFP). The ER marker was expressed as a transformation control, to be sure that infiltration had occurred and that the fluorescently tagged protein is expressed, even if fluorescence is not observed in the interaction test. Also, MUR3 is not expected to be involved in the xylan synthesis pathway, it was used as a negative control of random interactions with the IRX proteins. IRX9 did not interact with MUR3 as shown by lack of signal in I-P.

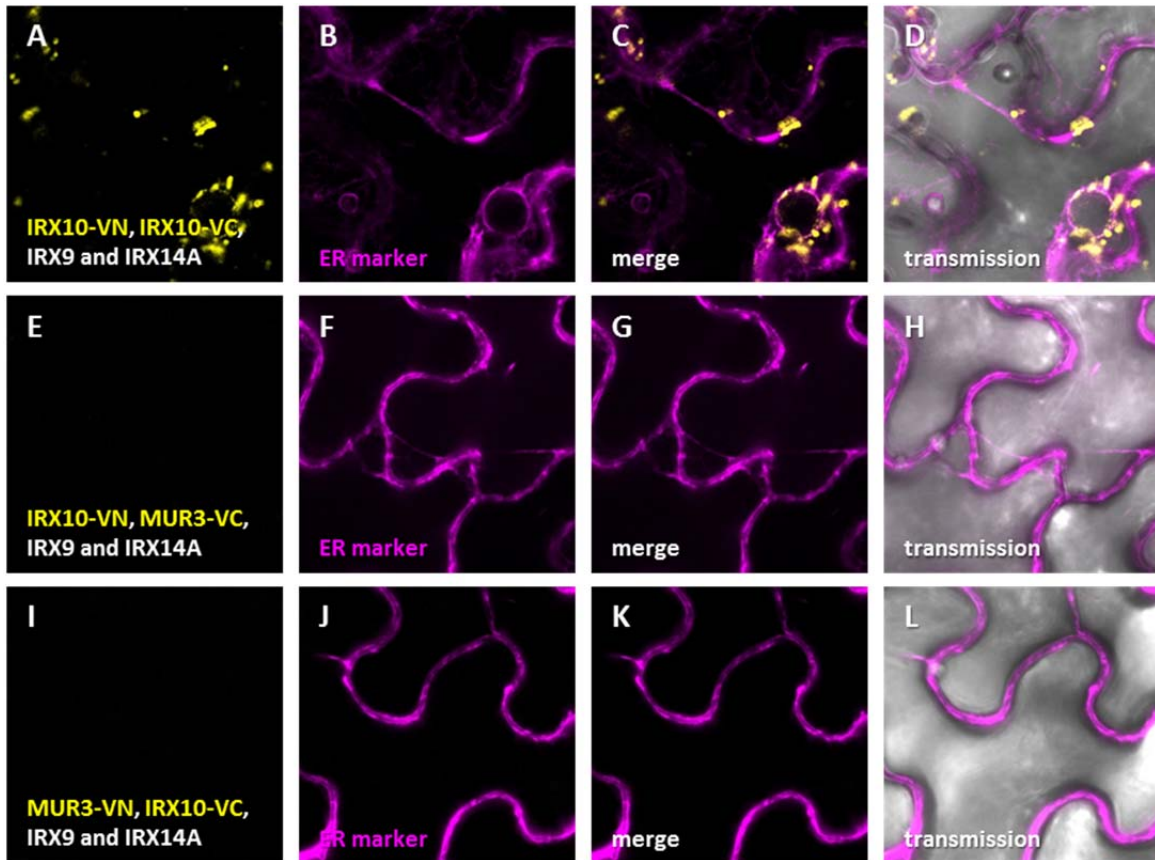

**Supplemental Figure 7: Expanded images from Figure 9D-F.**

A-D shows the expanded figures from Figure 9-F where the IRX10 homo-dimerisation is independent of the ER marker (MANI(49)-RFP). The ER marker was expressed as a transformation control. MUR3 is not expected to be involved in the xylan synthesis pathway and, as expected, did not interact with IRX10 as shown by lack of signal in E-L.

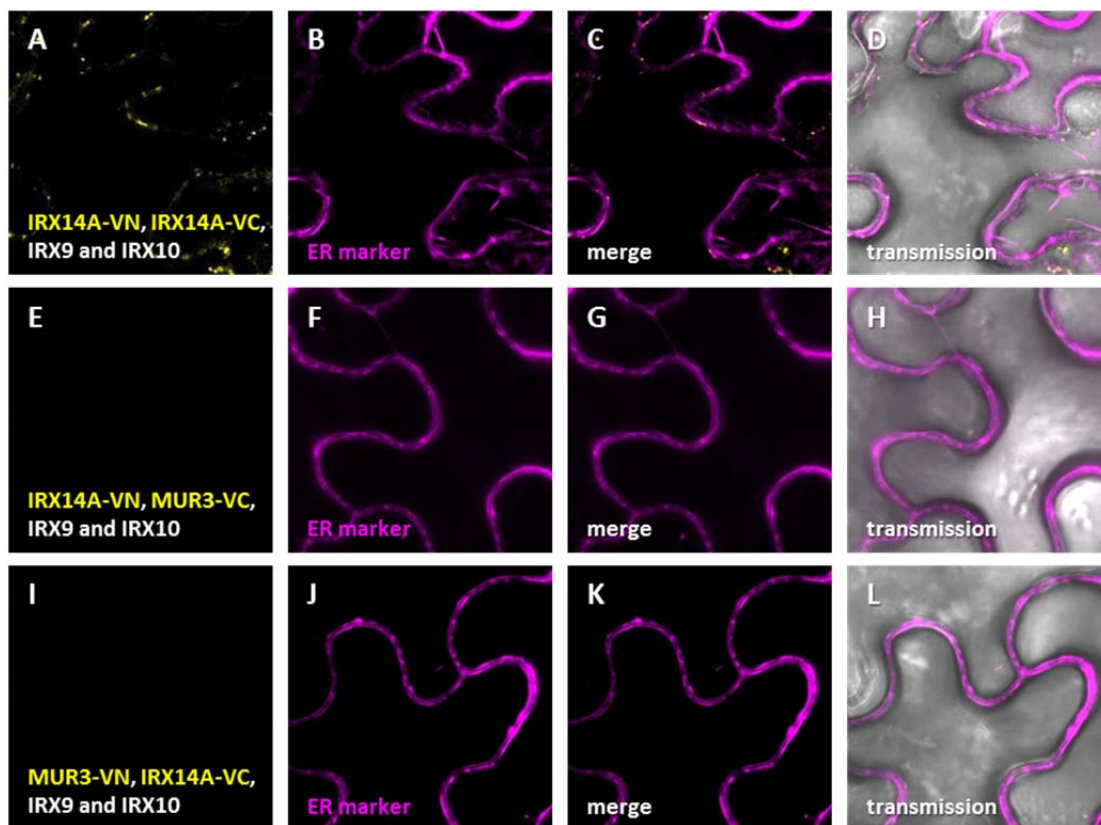

**Supplemental Figure 8: Expanded images from Figure 9G-I.**

A-D shows the expanded figures from Figure 9G-I where the IRX14A homo-dimerisation is independent of the ER marker (MANI(49)-RFP). The ER marker was expressed as a transformation control. MUR3 is not expected to be involved in the xylan synthesis pathway, and as expected, did not interact with IRX14 as shown by lack of signal in E-L.

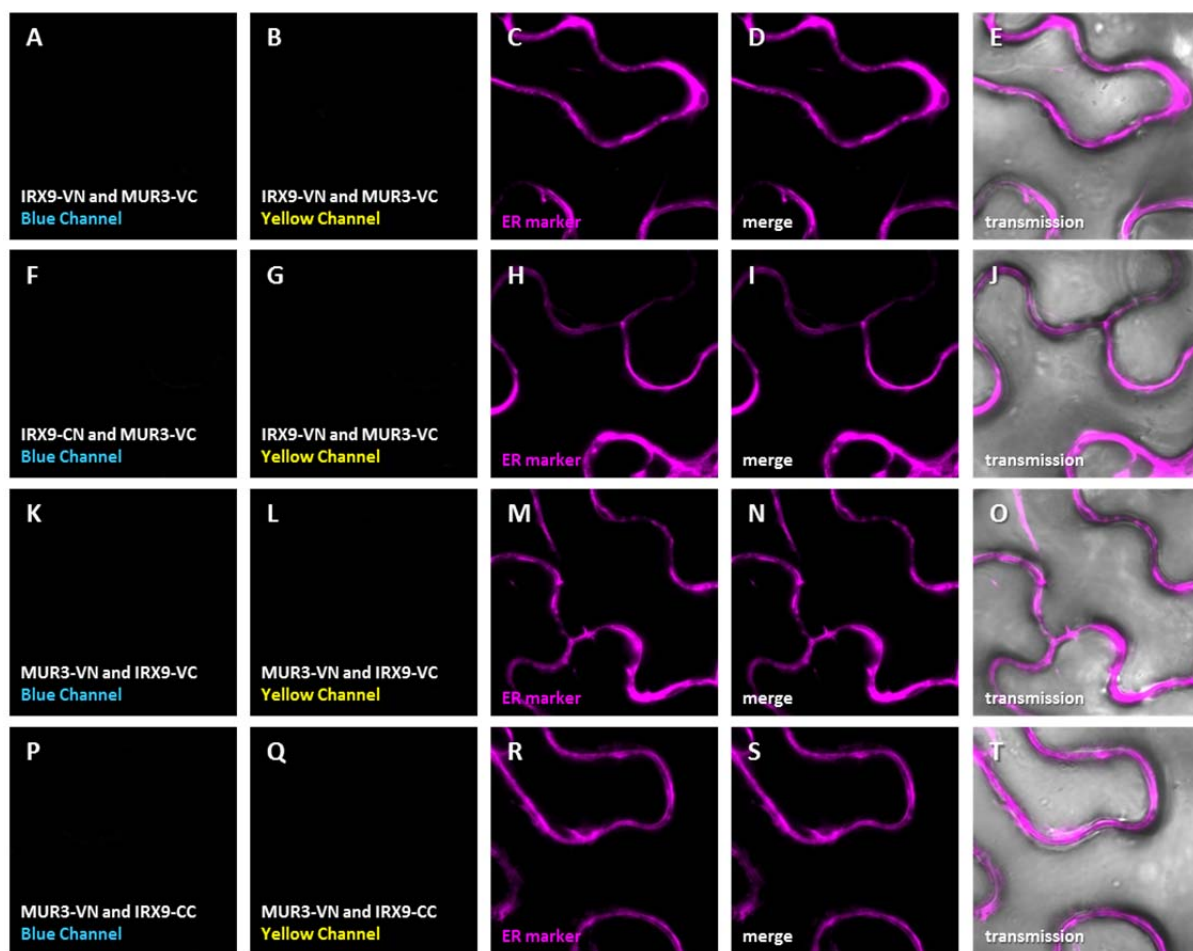

**Supplemental Figure 9: Negative controls for IRX9 in Figure 10.**

MUR3 is also not expected to be involved in the xylan synthesis pathway, and so it was used as a negative control of random interactions with the IRX proteins. In all cases, MUR3 did not interact with IRX9. The ER marker (MANI(49)-RFP) was used as a transformation control.

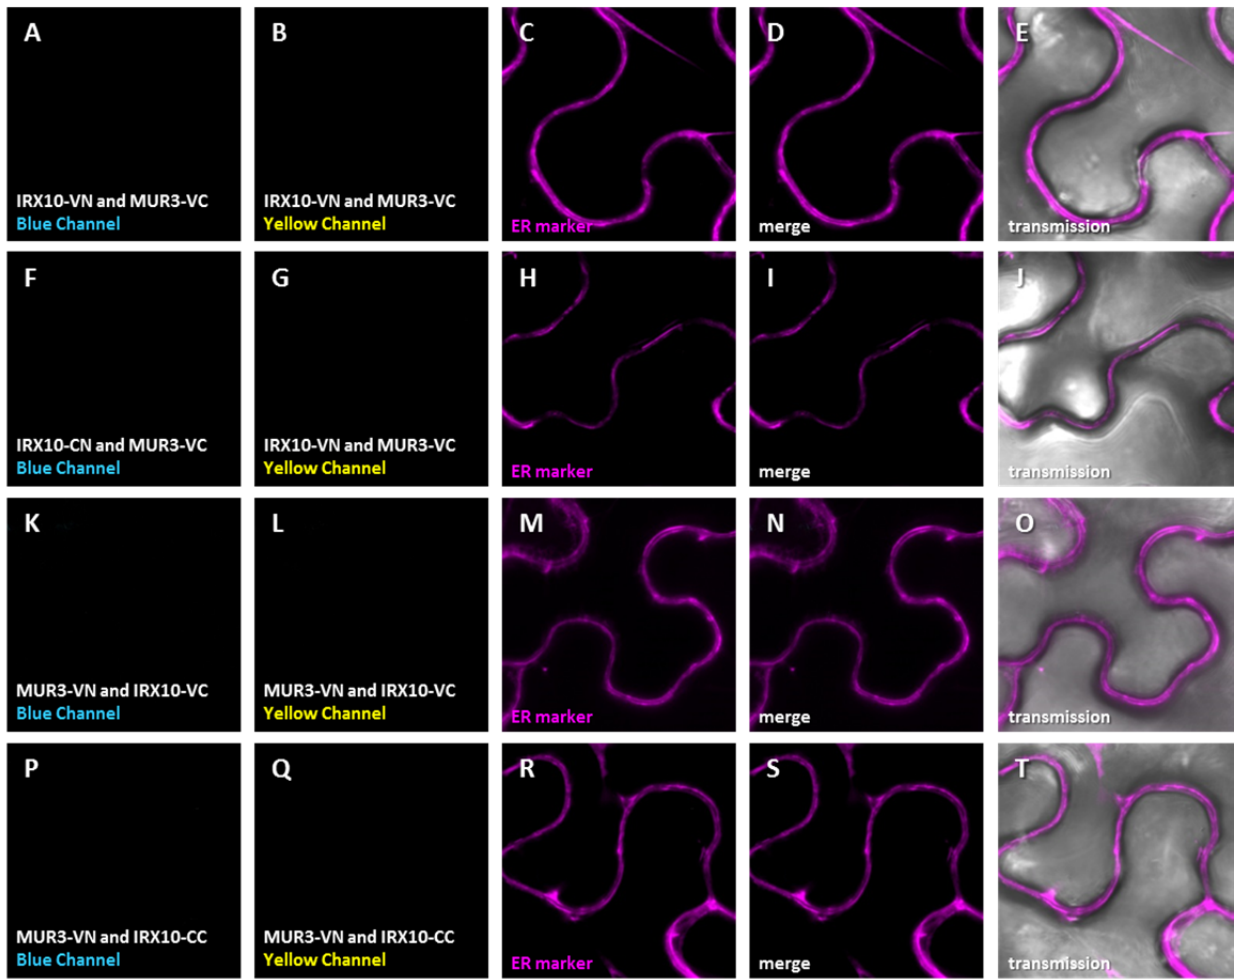

**Supplemental Figure 10: Negative controls for IRX10 in Figure 10.**

MUR3 is also not expected to be involved in the xylan synthesis pathway, and so it was used as a negative control of random interactions with the IRX proteins. In all cases, MUR3 did not interact with IRX10. The ER marker (MANI(49)-RFP) was used as a transformation control.

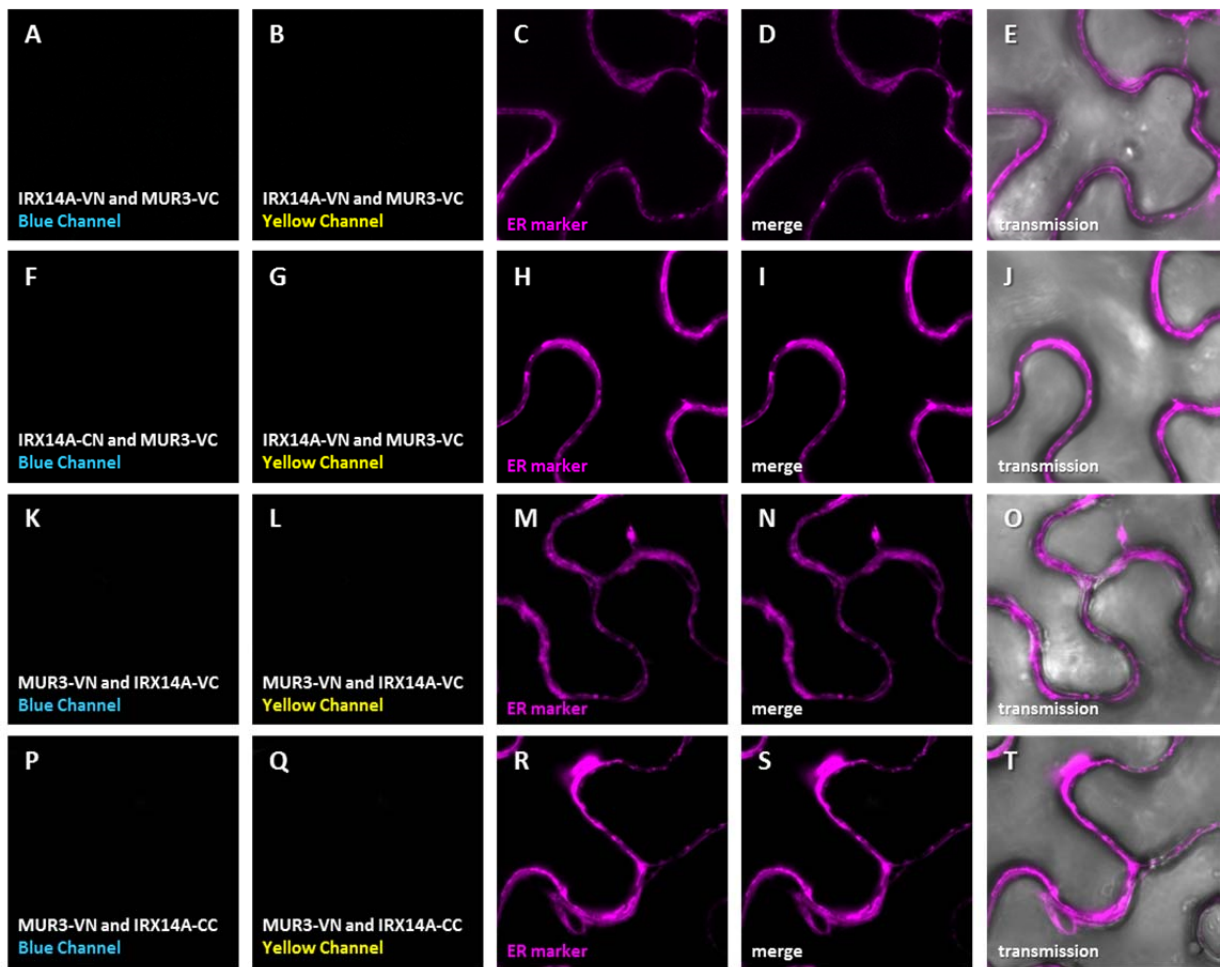

**Supplemental Figure 11: Negative controls for IRX14A in Figure 10.**

MUR3 is also not expected to be involved in the xylan synthesis pathway, and so it was used as a negative control of random interactions with the IRX proteins. In all cases, MUR3 did not interact with IRX14A. The ER marker (MANI(49)-RFP) was used as a transformation control.

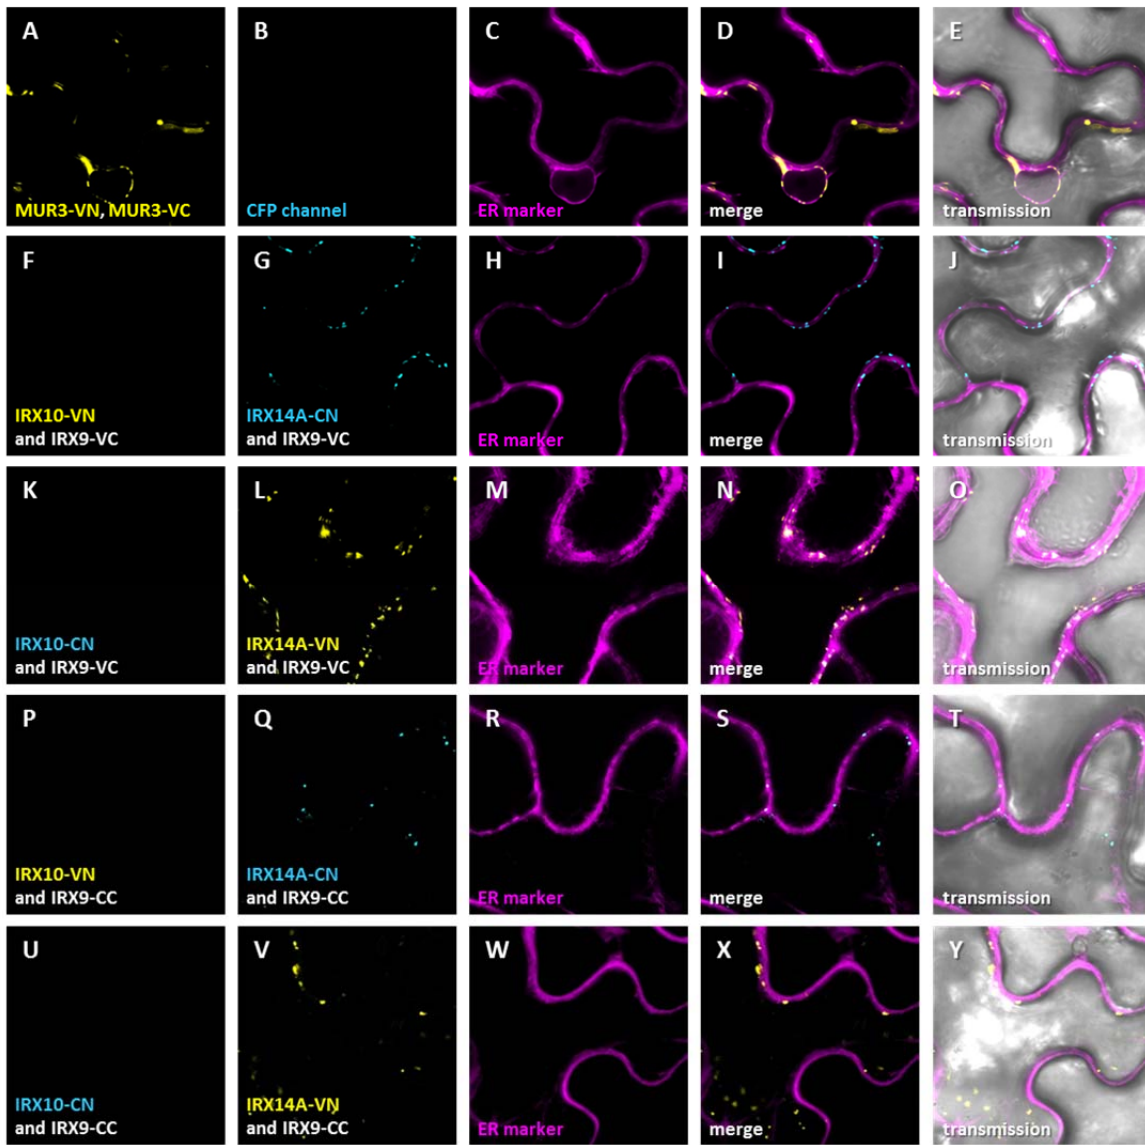

**Supplemental Figure 12: MUR3 positive control and expanded images from Figure 10A-D.**

MUR3 is known to form homo-dimers *in planta* (Søgaard *et al.*, 2012) and so it was used as a positive control for BiFC experiments. Strong fluorescence signal indicates this system is working (A-E). B shows the CFP channel, which is not able to pick up any signal emitted by VENUS fluorescent proteins. F-Y show the expanded figures from Figure 10A-D where IRX9-CC or IRX9-VC is the bait protein. Fluorescent signal indicates when another protein is able to interact with IRX9. In all cases, IRX14A interacts with IRX9 producing either yellow or blue fluorescence depending on the IRX14A fusion. In all cases IRX10 does not interact with IRX9 as no fluorescent signal is observed. The ER marker (MANI(49)-RFP) was used as a transformation control.

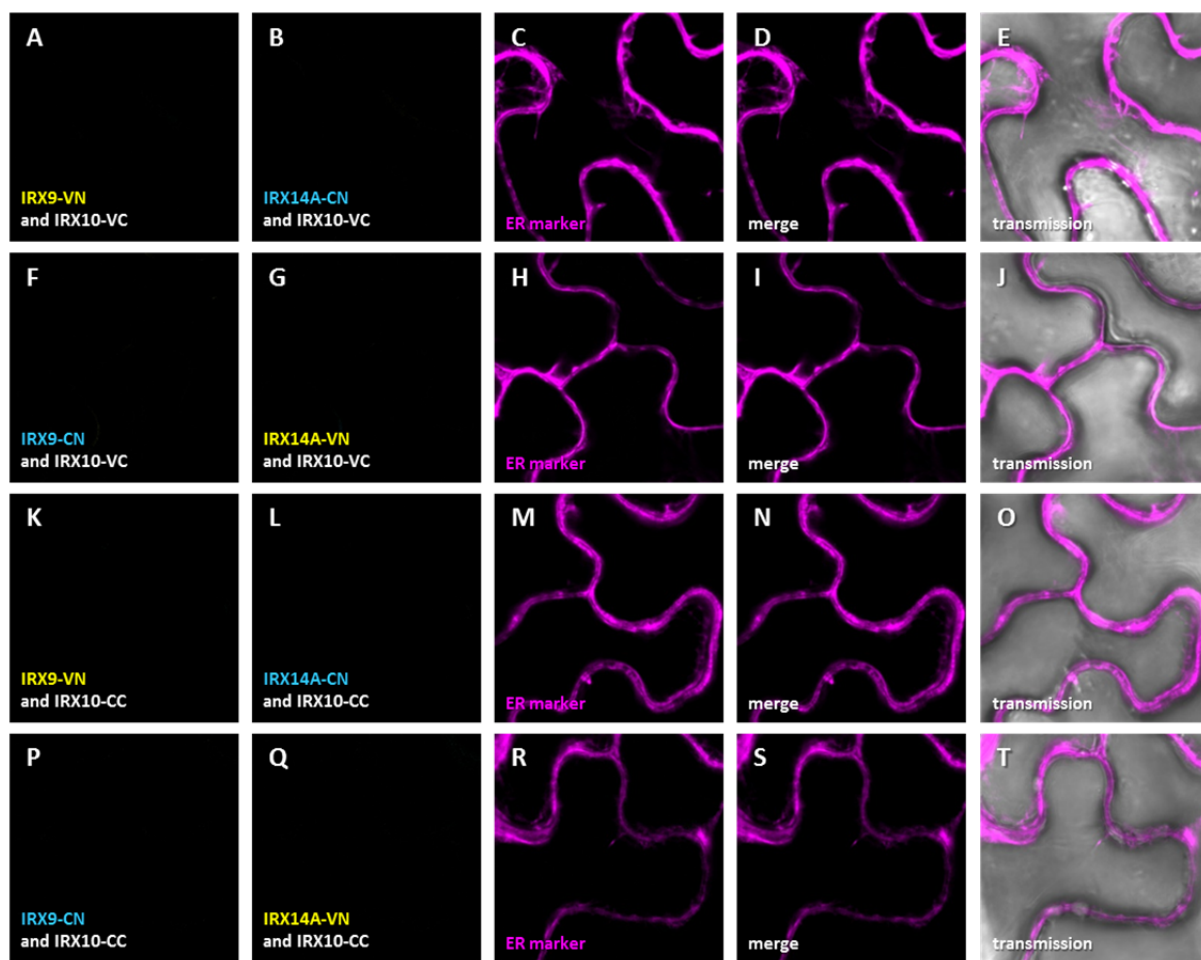

**Supplemental Figure 13: Expanded images from Figure 10E-H.**

A-T show the expanded images from Figure 10E-H where IRX10-CC (K-T) or IRX10-VC (A-J) is the bait protein. Fluorescent signal indicates when another protein is able to interact with IRX10. In all cases, neither IRX9 nor IRX14A interacted with IRX10. The ER marker (MANI(49)-RFP) was used as a transformation control.



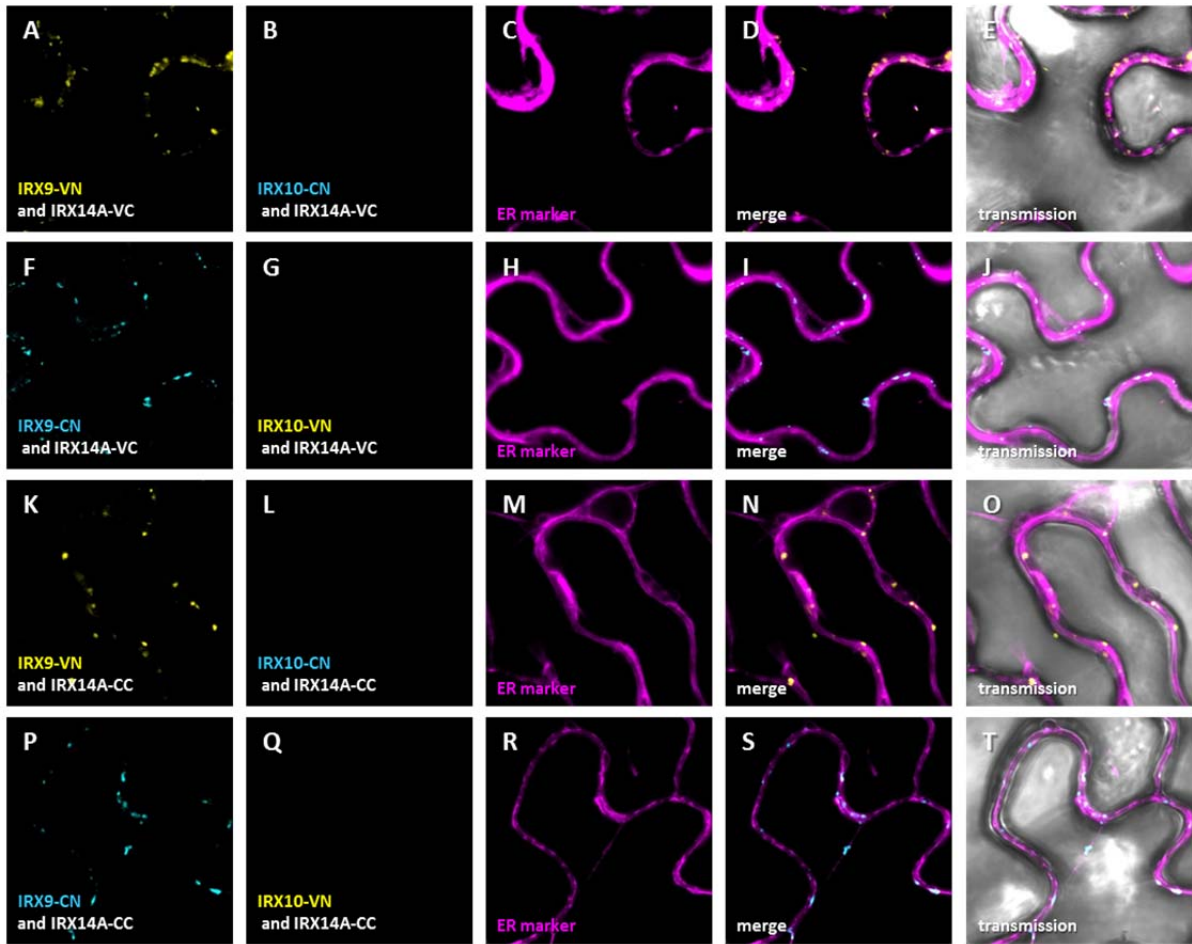

**Supplemental Figure 14: Expanded images from Figure 10I-L**

A-T show the expanded images from Figure 10 I-L where IRX14A-CC or IRX14A-VC is the bait protein. Fluorescent signal indicates when another protein is able to interact with IRX14A. In all cases, IRX14A interacts with IRX9 producing either yellow or blue fluorescence depending on the IRX9 fusion. In all cases IRX10 does not interact with IRX14A as no fluorescent signal is observed. The ER marker (MAGI(49)-RFP) was used as a transformation control.
