# Supplementary material
Source: PubMed Central journal article supplement (PMC4854693)
Supplement: supp_pp.15.01919_PP2015-01919R1_Supplemental_Table_2.pdf [file supp_pp.15.01919_PP2015-01919R1_Supplemental_Table_2.pdf]

1 **Supplemental Table 2: Summary of IRX construct combinations used in BiFC and**  
 2 **mcBiFC assays and results.**  
 3

| Constructs                 |                                      | Fluorescence (Yes/No)                            |
|----------------------------|--------------------------------------|--------------------------------------------------|
| <b>Homo-dimerisation</b>   |                                      |                                                  |
|                            | MUR3-VN + MUR3-VC                    | Yes – yellow (Positive control)                  |
|                            | IRX9-VN + IRX9-VC + IRX10 + IRX14A   | Yes – yellow (IRX9 homo-dimerises)               |
|                            | IRX9-VN + MUR3-VC+ IRX10 + IRX14A    | No (Negative control)                            |
|                            | MUR3-VN + IRX9-VC+ IRX10 + IRX14A    | No (Negative control)                            |
|                            | IRX10-VN + IRX10-VC + IRX9 + IRX14A  | Yes – yellow (IRX10 homo-dimerises)              |
|                            | IRX10-VN + MUR3-VC+ IRX9 + IRX14A    | No (Negative control)                            |
|                            | MUR3-VN + IRX10-VC+ IRX9 + IRX14A    | No (Negative control)                            |
|                            | IRX14A-VN + IRX14A-VC + IRX9 + IRX10 | Yes – yellow (IRX14 homo-dimerises)              |
|                            | IRX14A-VN + MUR3-VC+ IRX10 + IRX9    | No (Negative control)                            |
|                            | MUR3-VN + IRX14A-VC+ IRX10 + IRX9    | No (Negative control)                            |
| <b>Hetero-dimerisation</b> |                                      |                                                  |
| IRX9 bait                  | IRX9-VN + IRX10-VC + IRX14A-CC       | Yes – blue<br>(IRX9 and IRX14 hetero-dimerise)   |
|                            | IRX9-VN + IRX10-CC + IRX14A-VC       | Yes – yellow<br>(IRX9 and IRX14 hetero-dimerise) |
|                            | IRX9-CN + IRX10-VC + IRX14A-CC       | Yes – blue<br>(IRX9 and IRX14 hetero-dimerise)   |
|                            | IRX9-CN + IRX10-CC + IRX14-VC        | Yes – yellow<br>(IRX9 and IRX14 hetero-dimerise) |
| IRX10 bait                 | IRX10-VN + IRX9-VC + IRX14A-CC       | No                                               |
|                            | IRX10-VN + IRX9-CC + IRX14A-VC       | No                                               |
|                            | IRX10-CN + IRX9-VC + IRX14A-CC       | No                                               |
|                            | IRX10-CN + IRX9-CC + IRX14A-VC       | No                                               |
| IRX14A bait                | IRX14A-VN + IRX9-VC + IRX10-CC       | Yes – yellow<br>(IRX9 and IRX14 hetero-dimerise) |
|                            | IRX14A-VN + IRX9-CC + IRX10-VC       | Yes – blue<br>(IRX9 and IRX14 hetero-dimerise)   |
|                            | IRX14A-CN + IRX9-VC + IRX10-CC       | Yes – yellow<br>(IRX9 and IRX14 hetero-dimerise) |
|                            | IRX14A-CN + IRX9-CC + IRX10-VC       | Yes – blue<br>(IRX9 and IRX14 hetero-dimerise)   |
